# Supplementary material
Source: publisher figshare collection journal article supplement (https://karger.figshare.com/ndownloader/files/8955793)
Supplement: Supplementary file 1 [file 8955793]

## Erratum

---

We should like to add N.G.G.M. Abeling (biochemist at the Academic Medical Center, Amsterdam) to the list of authors of our article published in *Hormone Research in Paediatrics* (Horm Res Paediatr 2010;73:68–73). He was involved in this case at the time at the Department of Biochemical Genetics. His laboratory has made an important establishment on the serotonin derivatives in the CSF in this case.
